# Supplementary material for: Aberrant lncRNA expression in patients with proliferative diabetic retinopathy: preliminary results from a single-center observational study
Source: Springer Nature journal article supplement (doi:10.1186/s12886-023-02817-4), 2023-03-10
Supplement: MOESM2 [file 24610108]

**A**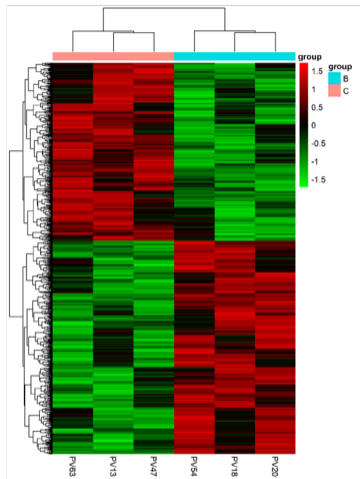**B**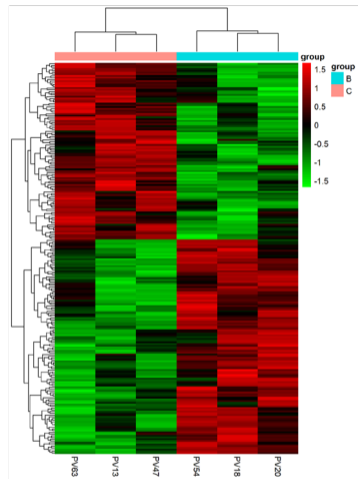

Figure S1. Heatmaps were generated from the hierarchical cluster analysis (Group B versus Group C). A: noncoding RNA transcripts; B: coding RNA transcripts. The color scale at the top illustrates the relative expression level of RNAs across all samples: red denotes expression greater than 0, and green denotes expression less than 0. Group B consisted of patients with PDR pretreated with conbercept 3–7 days before surgery; Group C consisted of patients with PDR who underwent surgery alone. PDR, proliferative diabetic retinopathy.
