# Supplementary material for: Aberrant lncRNA expression in patients with proliferative diabetic retinopathy: preliminary results from a single-center observational study
Source: Springer Nature journal article supplement (doi:10.1186/s12886-023-02817-4), 2023-03-10
Supplement: MOESM3 [file 24610108]

**A**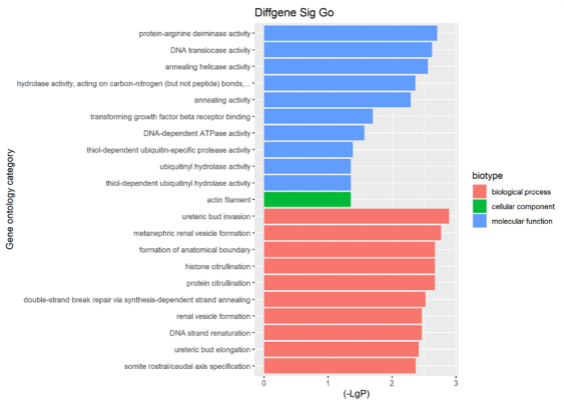**B**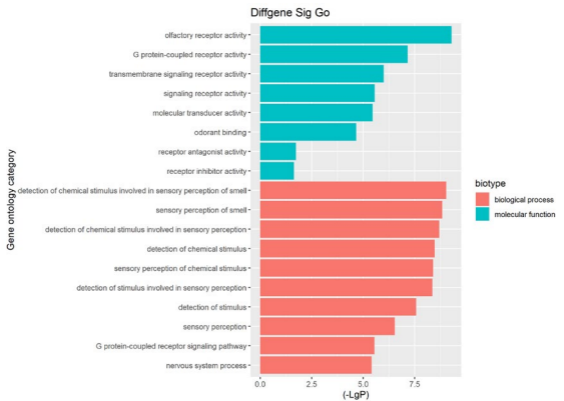

Figure S2. GO Enrichment Analysis (Group B versus Group C). A: upregulated transcripts; B: downregulated transcripts. The x-axis shows  $-\log_{10}(P\text{-value})$ . The y-axis shows GO category.  $P < 0.05$  was considered to be statistically significant. Group B consisted of patients with PDR pretreated with coberccept 3–7 days before surgery; Group C consisted of patients with PDR who underwent surgery alone. GO: Gene Ontology; PDR, proliferative diabetic retinopathy.
