# Supplementary material for: Aberrant lncRNA expression in patients with proliferative diabetic retinopathy: preliminary results from a single-center observational study
Source: Springer Nature journal article supplement (doi:10.1186/s12886-023-02817-4), 2023-03-10
Supplement: MOESM4 [file 24610108]

**A**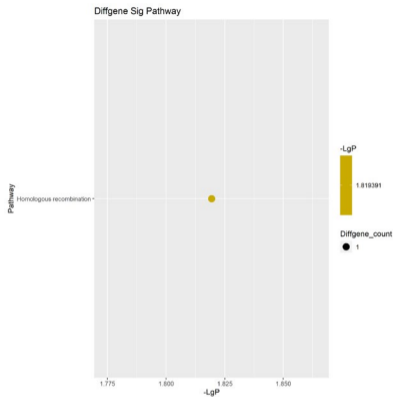**B**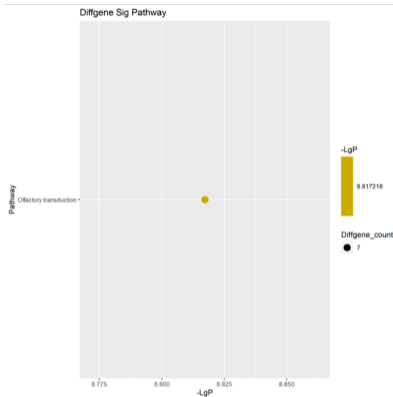

Figure S3. KEGG Pathway Enrichment Analysis (Group B versus Group C). As per the citation guidelines ([www.kegg.jp/kegg/kegg1.html](http://www.kegg.jp/kegg/kegg1.html)), KEGG analysis was used to predict the signaling pathways in which these differentially expressed transcripts may be involved [13-15]. These images were obtained by KEGG, and the Kanehisa laboratory have provided copyright permission. A: upregulated transcripts; B: downregulated transcripts. The x-axis shows  $-\log_{10}(P\text{-value})$ . The y-axis shows enriched pathway.  $P < 0.05$  was considered to be statistically significant. Group B consisted of patients with PDR pretreated with conbercept 3–7 days before surgery; Group C consisted of patients with PDR who underwent surgery alone. KEGG, Kyoto Encyclopedia of Genes and Genomes; PDR, proliferative diabetic retinopathy.
